# Supplementary material
Source: Springer Nature journal article supplement (https://www.springermedizin.de/resource/supplementary/13054_2010_8855_MOESM5_ESM.pdf/9732766)

### Correlation of CI and MFIm

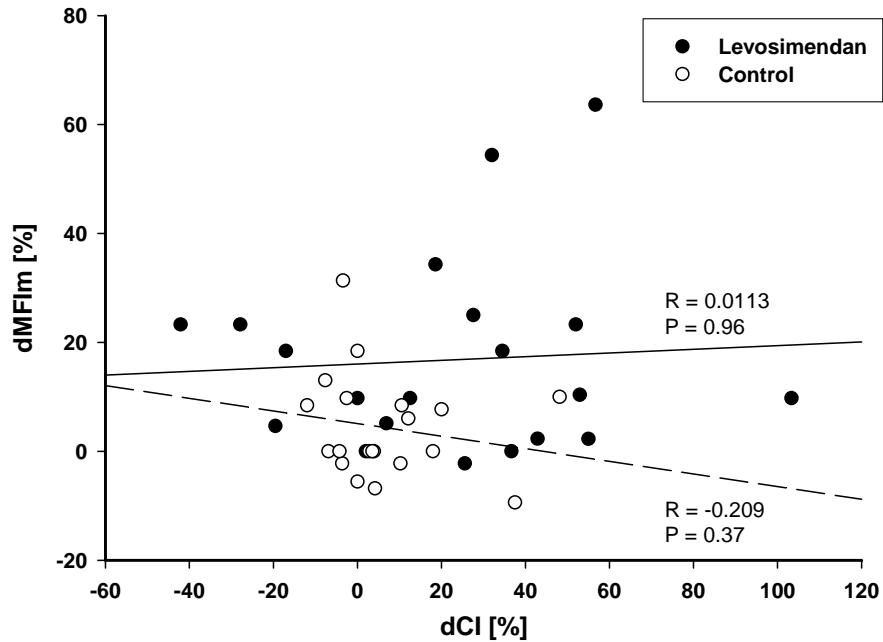

### Correlation of CI and MFIs

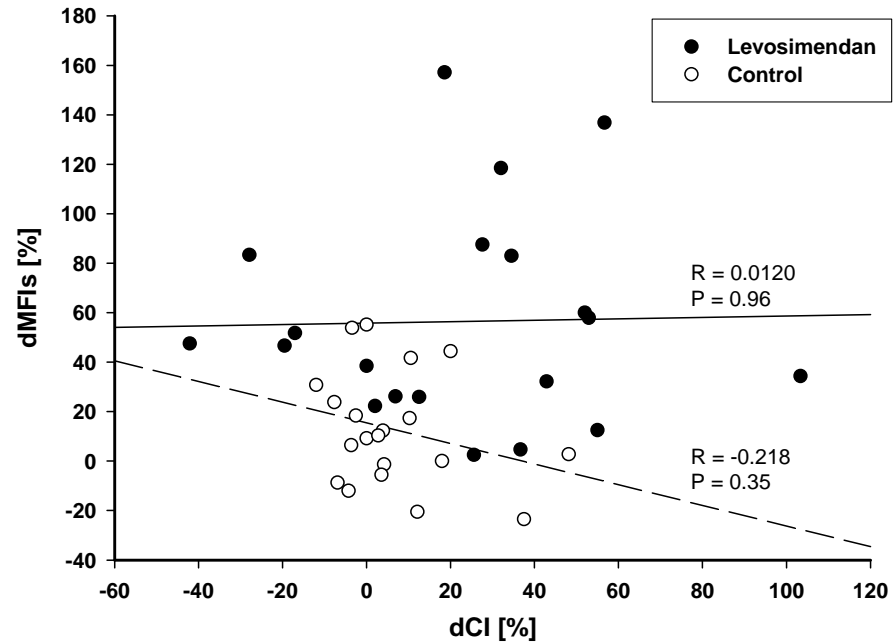

### Correlation of DO<sub>2</sub>I and MFIm

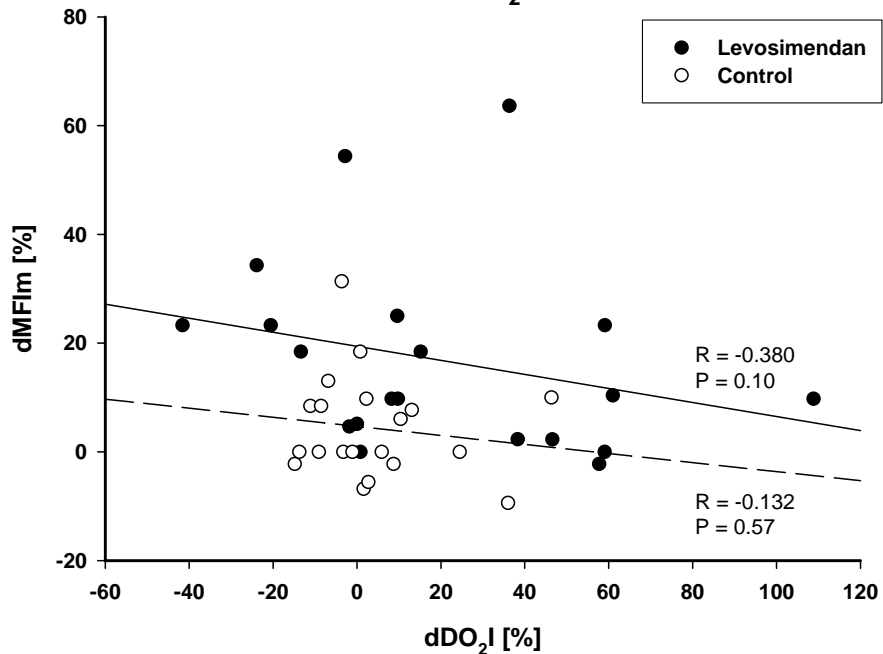

### Correlation of DO<sub>2</sub>I and MFIs

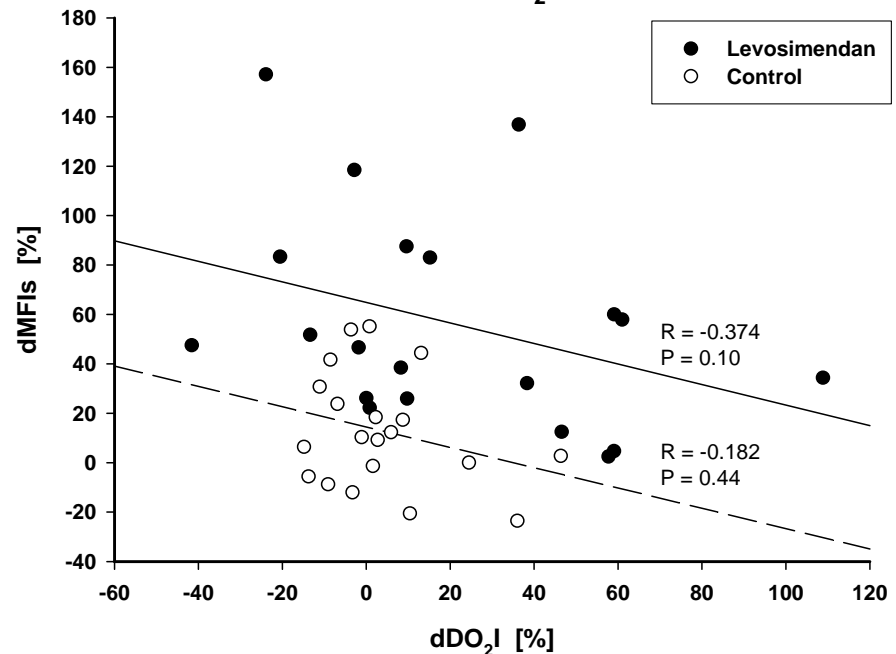

Supplement: MOESM5 [file 9732766]
